# Supplementary material
Source: PubMed Central journal article supplement (PMC3799321)
Supplement: 1304665110_pnas.201304665SI.pdf [file 1304665110_pnas.201304665SI.pdf]

# Supporting Information

Cowansage et al. 10.1073/pnas.1304665110

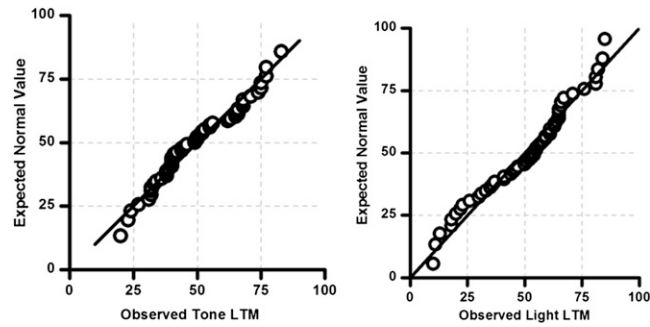

Fig. S1. Quantile–quantile plots depict actual freezing vs. expected normal values for tone (Left) and light (Right).

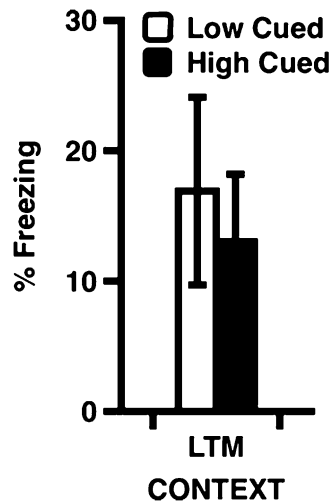

Fig. S2. Mice identified as expressing stable high versus low cued long-term memory (LTM) did not show a corresponding significant difference in context LTM.

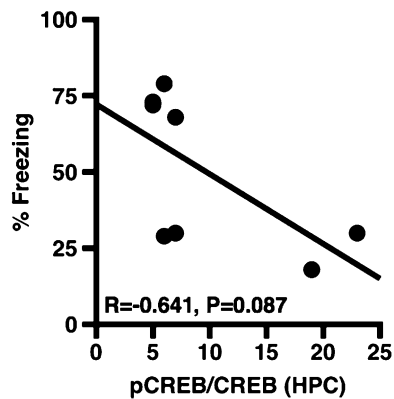

Fig. S3. Within a group of individual rats ( $n = 8$ ), hippocampal phospho-cAMP response element binding protein (pCREB)/CREB ratios trended toward being inversely related to their prior composite measures of cue-elicited LTM. (Pearson's correlation,  $R = -0.641$ ,  $P = 0.085$ ).

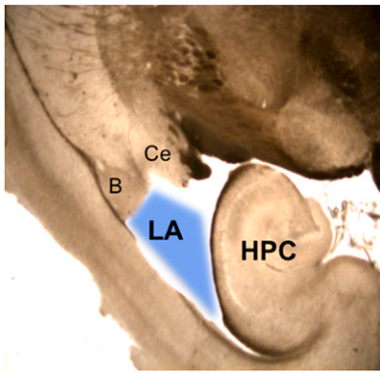

**Fig. S4.** Horizontal cross-section showing example of histology after fresh extraction of lateral amygdala (LA) tissue. Blue region indicates the area removed for protein analysis. Surrounding structures were left intact (basal amygdala, B; central amygdala, Ce; hippocampus, HPC).
